# Supplementary material
Source: PubMed Central journal article supplement (PMC6401471)
Supplement: JVI.02222-18-s0001.pdf [file JVI.02222-18-s0001.pdf]

733 **FIG. S1. Heparan sulfate and heparin.** Top) Cartoon representation of the NS and NA domains of a heparan  
 734 sulfate glycosaminoglycan chain. The NS domain is composed of 3-8 repeating disaccharides, and the NA domain  
 735 is composed of 2-12 repeating disaccharides. Bottom) Chemical structure of the heparan sulfate and heparin  
 736 repeating disaccharides. The repeating disaccharide of the heparan sulfate NS domain is similar to the repeating  
 737 disaccharide of heparin.

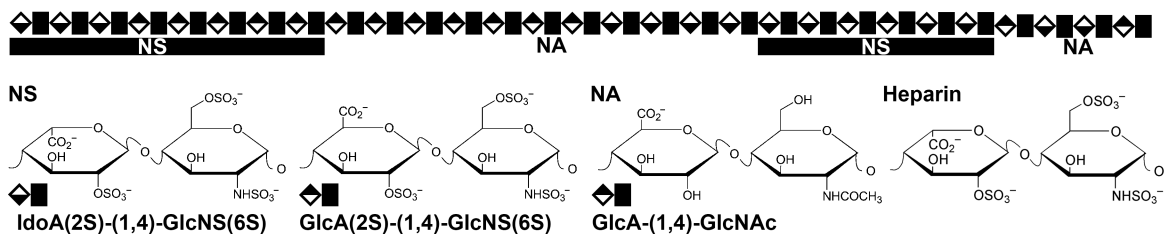

738

739

740 **FIG. S2. SDS-PAGE densitometry of PCV2 VLP heparin binding interaction.** Images represent the interaction  
 741 between PCV2 VLP and HyperD™ chromatography sorbent. The contrast of each digitized SDS-PAGE was scaled  
 742 to enhance the signal for visualization. This modification does not affect the intensity reported by the Image  
 743 Studio™ software used for the analysis. The numbers above each band represent the intensity corrected by  
 744 background subtraction within each box. A) Binding kinetics of 370nM and 97nM VLP demonstrating that the  
 745 signal from 370nM produces a robust readout (Fig. 2A). B) Elution of VLP from the sorbent with increasing  
 746 heparin concentration (Fig. 2B). GAG competition assay representatives of: C) 6-hexose, D) 10-hexose, E) 20-  
 747 hexose, F) 36-hexose heparin, G) dextran sulfate 8kDa, H) dextran 6kDa, I) hyaluronic acid, J) chondroitin sulfate  
 748 B. K) Linear response curve of the LI-CORR Odyssey CLX to increasing amount of PCV2 capsid protein, indicating  
 749 that intensity is directly correlated to protein content. L) Binding efficiency of *in vitro* assembled WT, K58A,  
 750 R59A, K63A, R73A, R89A, N128A, R186A, and Q188A capsids (Fig. 5). Inset is: WT K58A, R59A, K63A, R73A,  
 751 R89A, WT, N128A, R186A, and Q188A capsids. Figures made with Image Studio™ (LI-CORR Biosciences) and  
 752 Origin 2016 (OriginLab).

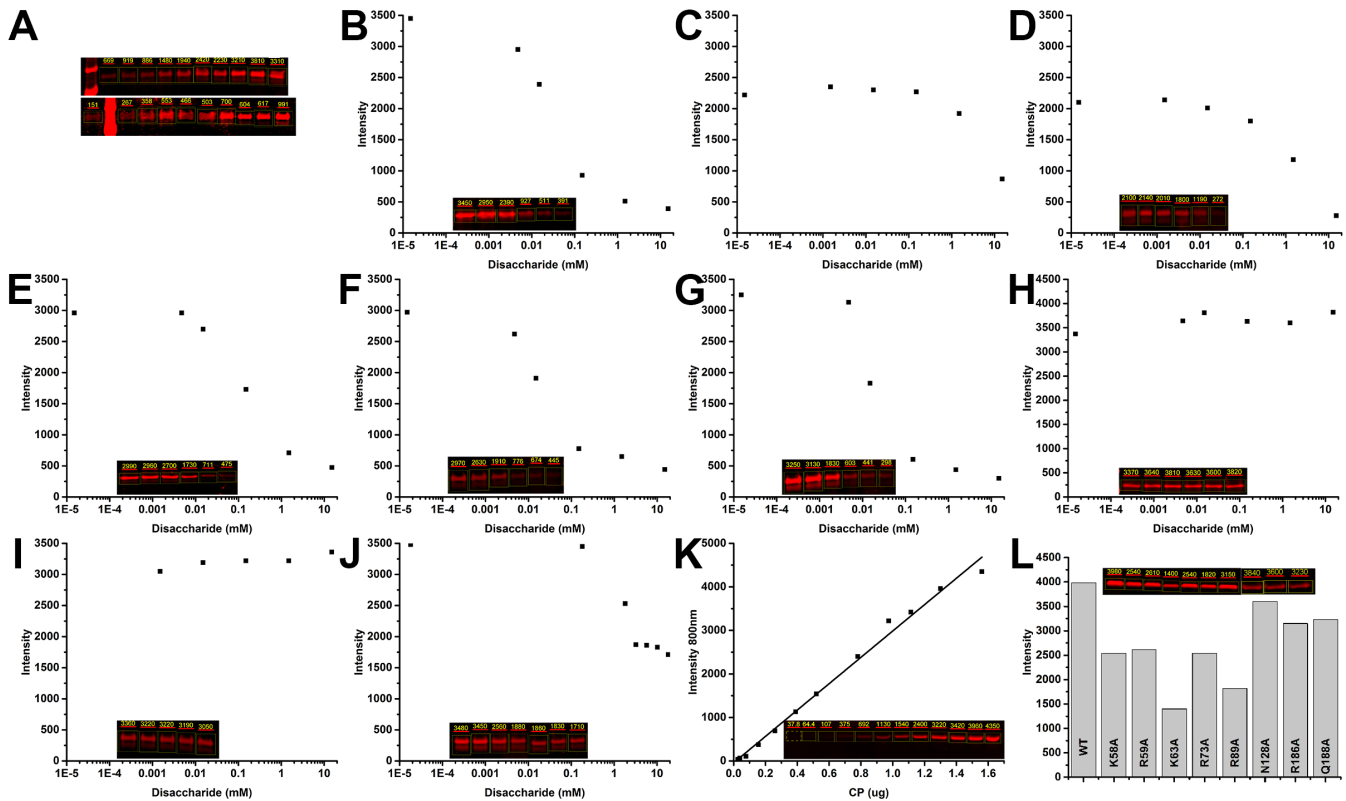

753

754

755 **FIG. S3. Local resolution.** The local resolution for each of the 10 classes was determined using the program  
756 MonoRes. Two plots are shown for each class due to the large range in resolution. The color bar on the left of  
757 each row depicts the resolution for the indicated color. A) The top plot was calculated using a resolution range  
758 of 2.8Å to 6Å and the bottom plot was calculated using a resolution range of 2.8Å to 30Å for classes 1 to 5. B)  
759 Similar to A but for classes 6 to 10 (48). Image generated using UCSF Chimera (64).

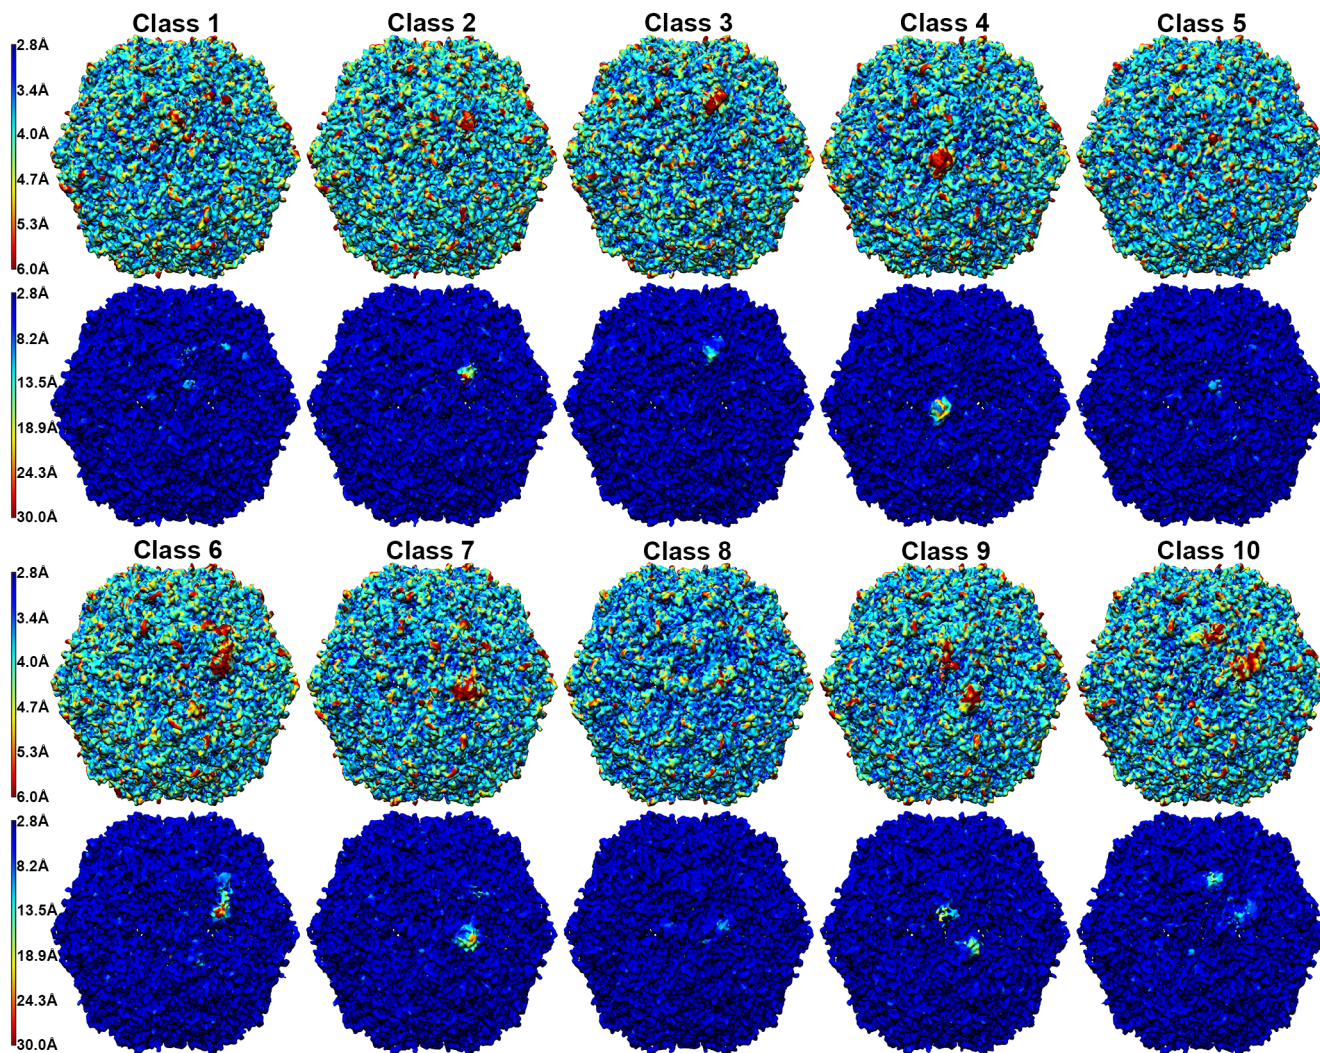

760

761

762 **FIG. S4. Assembly of mutant VLP.** Size exclusion chromatography profile of an *in vitro* assembled PCV2 VLP.  
763 Image made with Unicorn 6.1 (GE Health Care Life Sciences) and a corresponding electron microscope  
764 micrograph of the negative stained wild-type VLP.

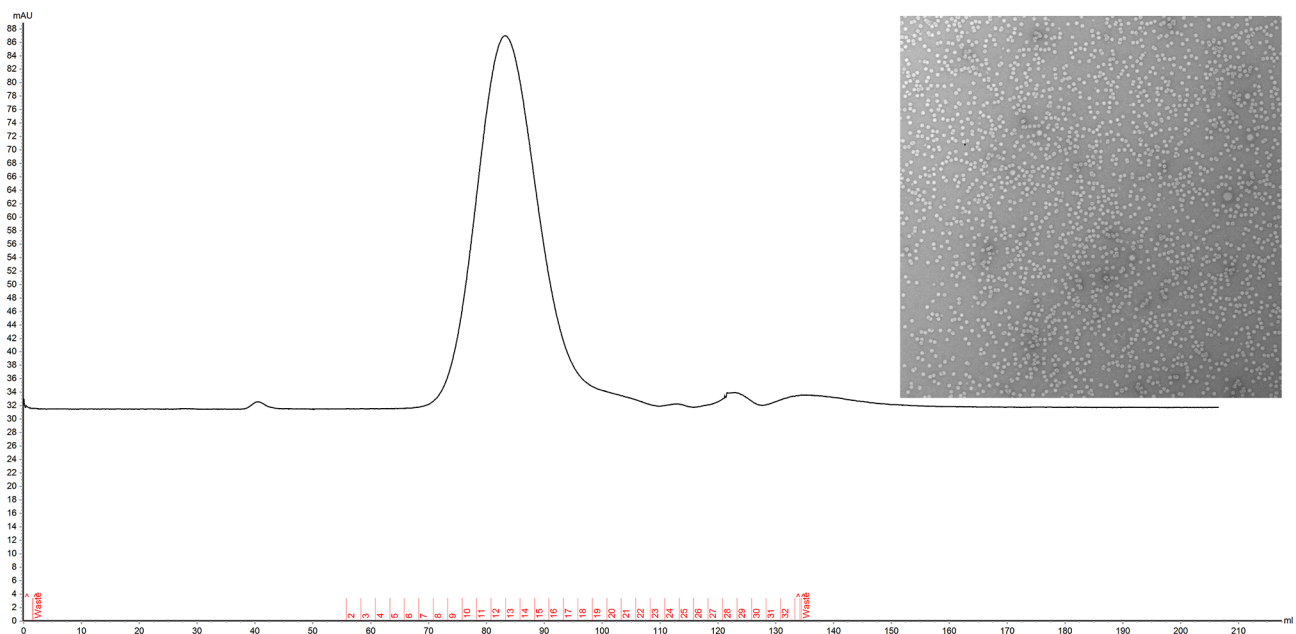

765

766

767 **FIG. S5. Occupied heparin binding sites on PCV2 VLPs.** The distribution follows a Gaussian profile with a  
768 minimum of 17, a mode of 31, and a maximum of 44 binding sites occupied on individual VLPs. Image made  
769 with Origin 2016 (OriginLab).

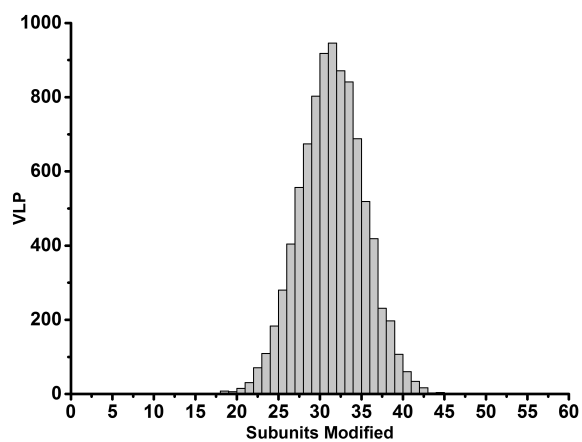

770
